# Supplementary material for: Isorhapontigenin Modulates SOX9/TOLLIP Expression to Attenuate Cell Apoptosis and Oxidative Stress in Paraquat‐Induced Acute Kidney Injury
Source: Hindawi journal article supplement (doi:10.1155/2022/3328623), 2022-01-01

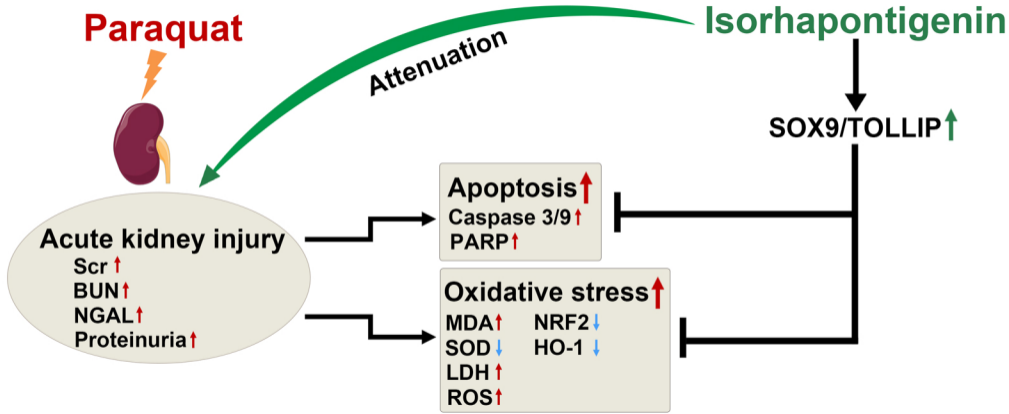

Supplement: f1 [file 3328623.f1.pdf]
